# Supplementary material
Source: publisher figshare collection journal article supplement (https://rs.figshare.com/ndownloader/files/13514984)
Supplement: Supplementary file 1 [file 13514984]

**Electronic supplementary material**

**Robust quantification of fish early life CO2 sensitivities via serial experimentation** Hannes Baumann, Emma L. Cross, and Christopher S. Murray

Reevaluation of experimental data using Hedges *d* instead of log-transformed response ratios as a metric for effect size.


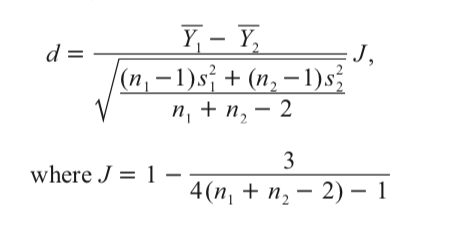
We computed effect sizes for all six traits and each of 20 experiments, using Hedges *d* following Prezlawski et al. ([2015](#_ENREF_2)) and advocated for by Koricheva et al. ([2013](#_ENREF_1)):

**
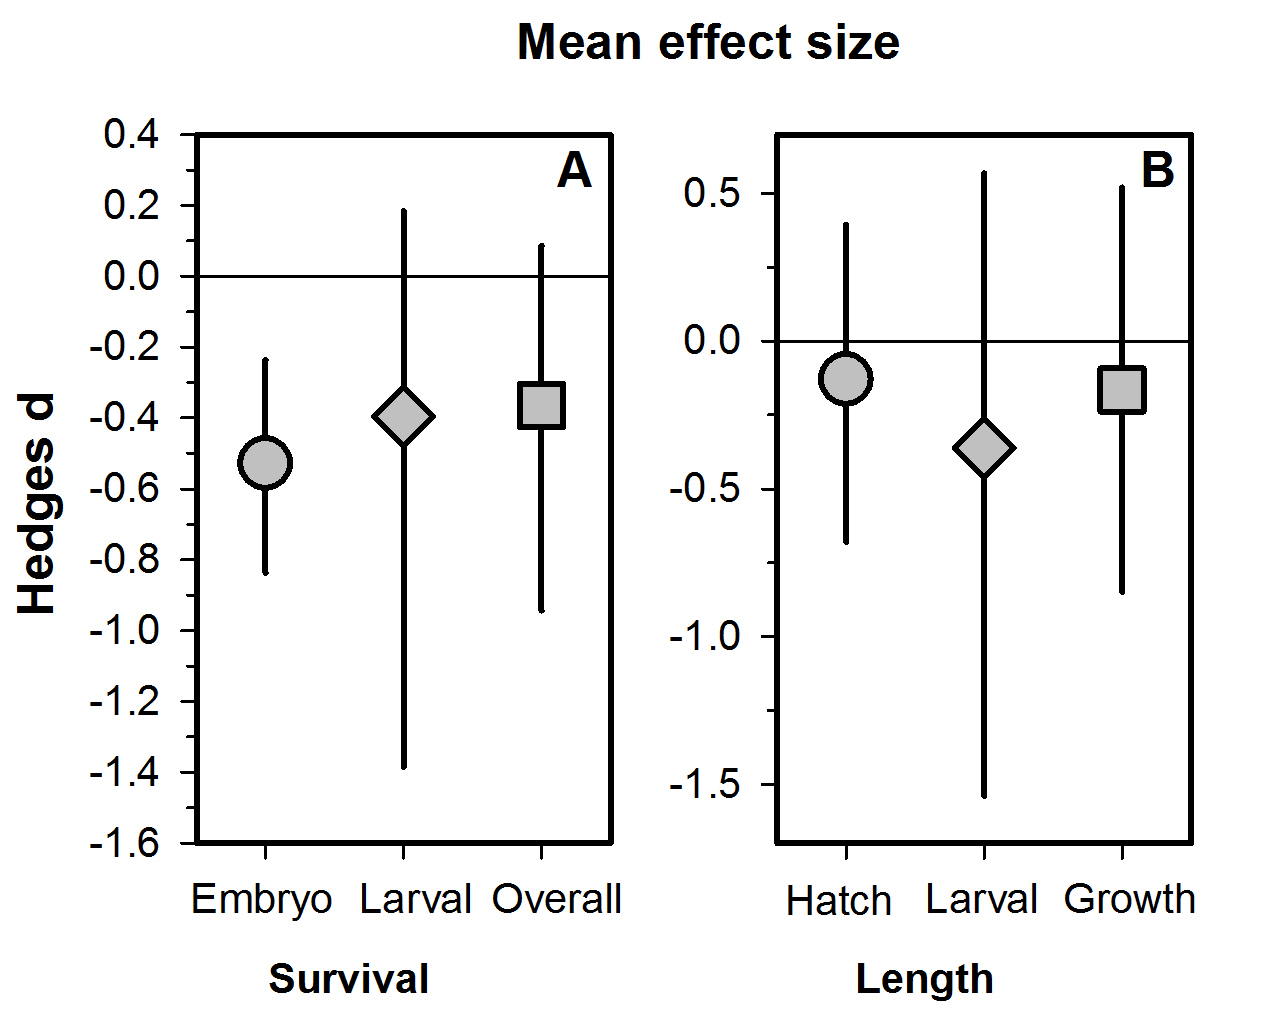
**We then averaged all *d* and calculated bias-corrected, bootstrapped 95% confidence intervals. Using this metric resulted in qualitatively consistent results, i.e., we observed consistently negative mean *d* values, with the confidence intervals suggesting significant overall reductions in embryo survival (Fig.1).

Koricheva, J., Gurevitch, Jessica, & Mengersen, K. (2013). *Handbook of meta-analysis in ecology and evolution*. Princeton, NJ: Princeton University Press.

Przeslawski, Rachel, Byrne, Maria, & Mellin, Camille. (2015). A review and meta-analysis of the effects of multiple abiotic stressors on marine embryos and larvae. *Global Change Biology, 21*(6), 2122-2140. doi: 10.1111/gcb.12833
